# Supplementary material
Source: publisher figshare collection journal article supplement (https://acs.figshare.com/ndownloader/files/10562914)
Supplement: Supplementary file 1 [file 10562914]

Archive with 6 entries (6 files):
- info.xml
- cr7b00424_high_quality.mp4
- 1802_Permission_Request_Form-signed.pdf
- cr7b00424.pdf
- Signed_Model_Release_Form.pdf
- Signed_Permission_Request_Form.pdf
