# Supplementary material
Source: publisher figshare collection journal article supplement (https://acs.figshare.com/ndownloader/files/10562914)
Supplement: Supplementary file 1 [file 10562914 › 1802_Permission_Request_Form-signed.pdf]

# Permission Request Form: for Use of Previously Published Figures/Tables/Artwork/Photos in ACS LiveSlides from Copyright Owners/Publishers/Photographers Other Than ACS.

If you have questions regarding this form, or if you have receive permissions from publishers via Rightslink, please contact [ACSPubsMultimedia@acs.org](mailto:ACSPubsMultimedia@acs.org)

Date: 02/15/2018

To: Teri W. Odom  
Publisher's/Copyright Owner's Contact Information  
todom@northwestern.edu  
  
  
Publisher's/Copyright Owner's Email Address

From: Danqing Wang  
Your Name and Complete Mailing Address  
1137 Maple Ave, 3E, Evanston, IL  
  
224-420-6869  
Your Phone Number Including Country and City Codes  
dangqingwang2018@u.northwestern.edu  
Your Email Address  
  
Your Specific Deadline Date

I am preparing an ACS LiveSlides entitled:  
Structural engineering in plasmon nanolasers

to appear with  
doi: 10.1021/acs.chemrev.7b00424

Title of ACS Publication and DOI

which is published by the American Chemical Society, a not-for-profit membership society and a STM signatory.

I would appreciate your permission to use the following material in all formats including but not limited to print, microform, electronic, and/or CD-ROM from the following reference:

## From a journal or magazine:

| Publication Title                                                                                        | Year | Vol. | No. | Page(s) | Material to be used |
|----------------------------------------------------------------------------------------------------------|------|------|-----|---------|---------------------|
| Lasing action in strongly coupled plasmonic nanocavity arrays, Nature Nanotech.                          | 8,   |      |     | 506     | (2013)              |
| Real-time tunable lasing from plasmonic nanocavity arrays, Nature Communications                         | 6,   |      |     | 6939    | (2015)              |
| Band-edge engineering for controlled multi-modal nanolasing in plasmonic superlattices, Nature Nanotech. | 12,  |      |     | 889–894 | (2017)              |

From a book: include book title, series name and number, year, page(s), book editor(s) name(s), chapter author's name(s), and material to be used, such as Figs. 2 & 3, full text, etc.

If you have a required credit line, please include it below:

For your convenience, you may sign and date the bottom of this letter to indicate your agreement. Please return this form to me at the above email address, by the above **deadline date** (if given above). Thank you.

Agreed:

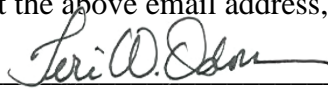  
Publisher's/Copyright Owner's Signature or Stamp

Date:

02/15/2018

Date

**SIGN HERE**

Submit completed and signed form with your signed ACS LiveSlides Video Release.

7/25/16
