# Supplementary material
Source: publisher figshare collection journal article supplement (https://acs.figshare.com/ndownloader/files/10562914)
Supplement: Supplementary file 1 [file 10562914 › info.xml]

<presentation>
	<article>
		<title>Structural Engineering in Plasmon Nanolasers</title>
		<doi>10.1021/acs.chemrev.7b00424</doi>
		<copyright>American Chemical Society</copyright>
		<narrator>Danqing Wang</narrator>
		<contact>Danqing Wang</contact>
		<contact-email>danqingwang2018@u.northwestern.edu</contact-email>
		<author-list>
			<author>Teri W. Odom</author>
		</author-list>
	</article>
	<slides height-width-ratio=".75">
		<slide audio-time="25">
			<subtitle/>
		</slide>
		<slide audio-time="57">
			<subtitle/>
		</slide>
		<slide audio-time="62">
			<subtitle/>
		</slide>
		<slide audio-time="56">
			<subtitle/>
		</slide>
		<slide audio-time="57">
			<subtitle/>
		</slide>
		<slide audio-time="83">
			<subtitle/>
		</slide>
		<slide audio-time="77">
			<subtitle/>
		</slide>
		<slide audio-time="49">
			<subtitle/>
		</slide>
	</slides>
	<audio duration="466"/>
</presentation>
