# Supplementary material
Source: publisher figshare collection journal article supplement (https://acs.figshare.com/ndownloader/files/10562914)
Supplement: Supplementary file 1 [file 10562914 › Signed_Model_Release_Form.pdf]

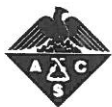

# AMERICAN CHEMICAL SOCIETY

## MODEL RELEASE FORM for ACS LiveSlides (Person in Photograph)

This form cannot be altered. For questions, please contact [ACSPubsMultimedia@acs.org](mailto:ACSPubsMultimedia@acs.org)

### Requesting Permission:

Date: 02/08/2018

To: Teri W. Odom  
terodom@northwestern.edu

Return to: Danfeng Wang  
Teeh K656, 2145 Sheldon Road  
60208, Evanston, IL  
danfeng.wang.2018@u.northwestern.edu

I am preparing material for

Structural Engineering in Plasmon Handlases  
(title of ACS LifeSlide)

to be published by the American Chemical Society, a not-for-profit membership society.

I would like your permission to include the enclosed photograph(s) in which you appear. To indicate your permission, please sign and date the statement below and return this form to me.

I appreciate your prompt response.

Signed: Danfeng Wang

### Grant of Permission:

I hereby grant to the American Chemical Society royalty-free permission, including nonexclusive world rights in all languages, to reproduce in all formats including but not limited to print, microform, electronic, and/or CD-ROM, to reproduce and include my likeness as shown in the attached photocopy(ies) of photograph(s) for the above-mentioned publication.

Agree to and accepted:

Signature Teri W. Odom Date: 02/08/2018

Check one of the blanks:

☒ Yes I am the person in the photo

☐ I am the authorized agent for the person in the photo (for group photographs, one person, in the photograph, needs to sign on behalf of the group)

Submit completed and signed form with your signed ACS Journals LifeSlides Video Release.

**SIGN HERE**
