# Supplementary material
Source: publisher figshare collection journal article supplement (https://acs.figshare.com/ndownloader/files/10562914)
Supplement: Supplementary file 1 [file 10562914 › Signed_Permission_Request_Form.pdf]

**Permission Request Form for Use of *Individual and/or Group Photos*  
in *ACS LiveSlides* from Copyright Owners/Publishers/Photographers  
Other Than ACS**

Date: 02/08/2018

To: Teri W. Odum  
Publisher's/Copyright Owner's Contact Information

todum@northwestern.edu

Publisher's/Copyright Owner's Email Address

From: Danqing Wang  
Your Name and Complete Mailing Address

Tech K656, 2145 Sheridan Road  
60208, Evanston, IL

224-420-6869

Your Phone Number Including Country and City Codes

danqingwang2018@u.northwestern.edu  
Your Email Address

Your Specific Deadline Date

I am preparing an *ACS LiveSlides* entitled:

Structural Engineering in Plasmon Nanolasers

to appear with

Structural Engineering in Plasmon Nanolasers, DOI: 10.1021/acs.chemrev.7b00424  
Title of ACS Publication and DOI

which is published by the American Chemical Society, a not-for-profit membership society and a STM signatory.

I would appreciate your permission to use the following material in all formats including but not limited to print, microform, electronic, and/or CD-ROM from the following reference:

**Individual Photographs of the Following Individuals:**

**Collective Photograph (s) representing the following groups:**

The Odum Group

The Schatz Group

If you, the photographer, have a required **credit line**, please include it below:

For your convenience, you may sign and date the bottom of this letter to indicate your agreement. Please return this form to me at the above email address, by the above **deadline date** (if given above). Thank you.

Agreed:

Teri W. Odum

Publisher's/Copyright Owner's Signature or Stamp

Date:

02/08/2018

Date

**SIGNATURE**

Submit completed and signed form with your signed *ACS LiveSlides* Video Release.

7/25/16
